# Supplementary material for: Theoretical investigation of the relative impacts of water and ammonia on the tropospheric conversion of N2O5 to HNO3
Source: Royal Society of Chemistry journal article supplement (doi:10.1039/d0cp05553k), 2021-01-01
Supplement: d0cp05553k1.pdf [file d0cp05553k1.pdf]

**Supporting Information**  
**for**  
**Theoretical Investigation of the Relative Impacts**  
**of Water and Ammonia on the Tropospheric**  
**Conversion of  $N_2O_5$  to  $HNO_3$**

Saptarshi Sarkar and Biman Bandyopadhyay\*

*Department of Chemistry, Malaviya National Institute of Technology Jaipur, Jaipur,  
302017, India*

E-mail: [biman.chy@mnit.ac.in](mailto:biman.chy@mnit.ac.in)

**Proof for same value of termolecular rate constant ( $k_t$ ) of three different reaction channels for  $\text{NH}_3$  catalyzed hydrolysis:**

In presence of a catalyst (Y), there are three possibilities; in first case,  $\text{N}_2\text{O}_5$  first reacts with X to form  $\text{N}_2\text{O}_5\text{-X}$  complex and then it reacts with Y. In the second case first X binds with Y to form X-Y complex and then it reacts with  $\text{N}_2\text{O}_5$  and in the third case  $\text{N}_2\text{O}_5$  first reacts with Y to form  $\text{N}_2\text{O}_5\text{-Y}$  complex and then it reacts with X. Scheme for this reaction can be written as follows-

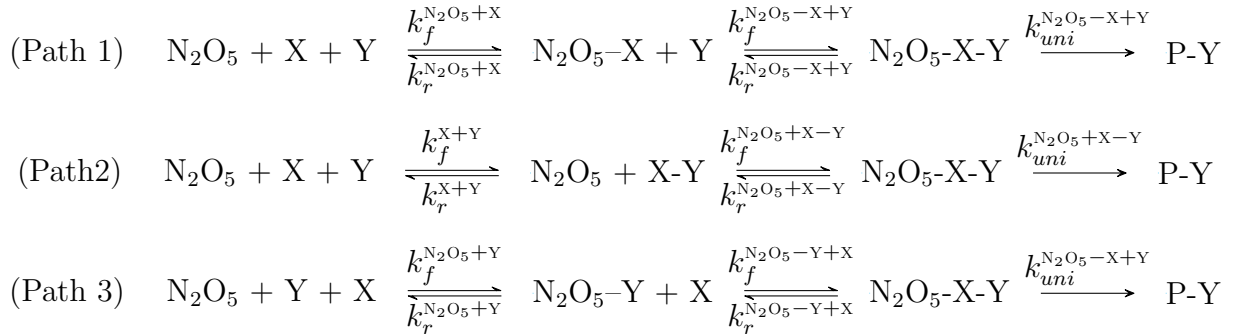

For Path 1-

$$K_{eq}^{\text{N}_2\text{O}_5+\text{X}} = \frac{[\text{N}_2\text{O}_5 - \text{X}]}{[\text{N}_2\text{O}_5][\text{X}]} \quad (1)$$

and

$$K_{eq}^{\text{N}_2\text{O}_5\text{-X+Y}} = \frac{[\text{N}_2\text{O}_5 - \text{X} - \text{Y}]}{[\text{N}_2\text{O}_5 - \text{X}][\text{Y}]} \quad (2)$$

Therefore,

$$K_{eq}^{\text{N}_2\text{O}_5+\text{X}} \times K_{eq}^{\text{N}_2\text{O}_5\text{-X+Y}} = \frac{[\text{N}_2\text{O}_5 - \text{X} - \text{Y}]}{[\text{N}_2\text{O}_5][\text{X}][\text{Y}]} \quad (3)$$

Similarly, for Path 2-

$$K_{eq}^{\text{X+Y}} \times K_{eq}^{\text{N}_2\text{O}_5+\text{X-Y}} = \frac{[\text{X} - \text{Y}]}{[\text{X}][\text{Y}]} \times \frac{[\text{N}_2\text{O}_5 + \text{X} - \text{Y}]}{[\text{N}_2\text{O}_5][\text{X} - \text{Y}]} = \frac{[\text{N}_2\text{O}_5 - \text{X} - \text{Y}]}{[\text{N}_2\text{O}_5][\text{X}][\text{Y}]} \quad (4)$$

Similarly, for Path 3-

$$K_{eq}^{N_2O_5+Y} \times K_{eq}^{N_2O_5-Y+X} = \frac{[N_2O_5 - Y]}{[N_2O_5][Y]} \times \frac{[N_2O_5 - X - Y]}{[N_2O_5 - Y][X]} = \frac{[N_2O_5 - X - Y]}{[N_2O_5][X][Y]} \quad (5)$$

From the equation 3, 4 and 5, it is clear that, the product of  $K_{eq}^{N_2O_5+X}$  and  $K_{eq}^{N_2O_5-X+Y}$  or  $K_{eq}^{X+Y}$  and  $K_{eq}^{N_2O_5+X-Y}$  or  $K_{eq}^{N_2O_5+Y}$  and  $K_{eq}^{N_2O_5-Y+X}$  for Path 1, Path 2 and Path 3 are also same, it gives same termolecular rate ( $k_t$ ).

**Table S1: Concentrations of water and ammonia (in molecules  $\text{cm}^{-3}$ ) within 280 to 320 K at 0 km altitude**

| Species                | Abundance | T(K)                  |                       |                       |                       |                       |                       |
|------------------------|-----------|-----------------------|-----------------------|-----------------------|-----------------------|-----------------------|-----------------------|
|                        |           | 280                   | 290                   | 298                   | 300                   | 310                   | 320                   |
| $\text{H}_2\text{O}^a$ | 20% RH    | $5.16 \times 10^{16}$ | $9.56 \times 10^{16}$ | $1.55 \times 10^{17}$ | $1.72 \times 10^{17}$ | $2.92 \times 10^{17}$ | $4.70 \times 10^{17}$ |
|                        | 100% RH   | $2.58 \times 10^{17}$ | $4.78 \times 10^{17}$ | $7.73 \times 10^{17}$ | $8.58 \times 10^{17}$ | $1.46 \times 10^{17}$ | $2.35 \times 10^{17}$ |
| $\text{NH}_3^b$        | 0.1 ppbv  | $2.62 \times 10^9$    | $2.53 \times 10^9$    | $2.46 \times 10^9$    | $2.44 \times 10^9$    | $2.36 \times 10^9$    | $2.29 \times 10^9$    |
|                        | 10 ppbv   | $2.62 \times 10^{11}$ | $2.53 \times 10^{11}$ | $2.46 \times 10^{11}$ | $2.44 \times 10^{11}$ | $2.36 \times 10^{11}$ | $2.29 \times 10^{11}$ |
|                        | 2900 ppbv | $7.61 \times 10^{13}$ | $7.34 \times 10^{13}$ | $7.14 \times 10^{13}$ | $7.10 \times 10^{13}$ | $6.87 \times 10^{13}$ | $6.66 \times 10^{13}$ |

<sup>a</sup>-Reference 1

<sup>b</sup>-References 2-5

**Table S2: Concentrations of water and ammonia (molecules  $\text{cm}^{-3}$ ) from 0 to 15 km altitudes in troposphere**

| Altitude(km) | $\text{H}_2\text{O}^a$ | $\text{NH}_3^b$      |
|--------------|------------------------|----------------------|
| 0            | $5.2 \times 10^{17}$   | $2.5 \times 10^{11}$ |
| 5            | $2.4 \times 10^{16}$   | $7.6 \times 10^9$    |
| 10           | $4.9 \times 10^{15}$   | $8.5 \times 10^8$    |
| 15           | $2.0 \times 10^{13}$   | $1.2 \times 10^8$    |

<sup>a</sup>-Reference 1

<sup>b</sup>-References 6-8

**Table S3: Equilibrium constants ( $\text{cm}^3 \text{ molecule}^{-1}$ ), unimolecular rate coefficients ( $\text{s}^{-1}$ ), bimolecular rate coefficients ( $\text{cm}^3 \text{ molecule}^{-1} \text{ s}^{-1}$ ) and termolecular rate coefficients ( $\text{cm}^6 \text{ molecule}^{-2} \text{ s}^{-1}$ ) for all the studied reaction channels at different temperatures**

| Reactions            | Catalysts            | Channels                        | Rate Constants                                    | T (K)                                      |                       |                       |                       |                       |                       |                       |                       |                       |                       |                       |                       |                       |                       |                       |
|----------------------|----------------------|---------------------------------|---------------------------------------------------|--------------------------------------------|-----------------------|-----------------------|-----------------------|-----------------------|-----------------------|-----------------------|-----------------------|-----------------------|-----------------------|-----------------------|-----------------------|-----------------------|-----------------------|-----------------------|
|                      |                      |                                 |                                                   | 213                                        | 216                   | 219                   | 224                   | 230                   | 235                   | 250                   | 259                   | 280                   | 290                   | 298                   | 300                   | 310                   | 320                   |                       |
| Hydrolysis           | Uncat                | A                               | $K_{\text{eq}}^{\text{NO}_2+\text{H}_2\text{O}}$  | $7.9 \times 10^{-23}$                      | $7.2 \times 10^{-23}$ | $6.6 \times 10^{-23}$ | $5.7 \times 10^{-23}$ | $4.9 \times 10^{-23}$ | $4.3 \times 10^{-23}$ | $3.0 \times 10^{-23}$ | $2.5 \times 10^{-23}$ | $1.7 \times 10^{-23}$ | $1.5 \times 10^{-23}$ | $1.3 \times 10^{-23}$ | $1.3 \times 10^{-23}$ | $1.1 \times 10^{-23}$ | $1.0 \times 10^{-23}$ |                       |
|                      |                      |                                 | $k_{\text{uni}}^{\text{NO}_2+\text{H}_2\text{O}}$ | $5.3 \times 10^{-11}$                      | $1.0 \times 10^{-10}$ | $2.0 \times 10^{-10}$ | $5.7 \times 10^{-10}$ | $1.9 \times 10^{-9}$  | $4.9 \times 10^{-9}$  | $6.8 \times 10^{-8}$  | $2.8 \times 10^{-7}$  | $5.5 \times 10^{-6}$  | $2.0 \times 10^{-5}$  | $5.0 \times 10^{-5}$  | $6.3 \times 10^{-5}$  | $1.9 \times 10^{-4}$  | $5.3 \times 10^{-4}$  |                       |
|                      |                      |                                 | $k_{\text{bi}}^{\text{NO}_2+\text{H}_2\text{O}}$  | $4.2 \times 10^{-33}$                      | $7.5 \times 10^{-33}$ | $1.3 \times 10^{-32}$ | $3.3 \times 10^{-32}$ | $9.3 \times 10^{-32}$ | $2.1 \times 10^{-31}$ | $2.1 \times 10^{-30}$ | $7.2 \times 10^{-30}$ | $9.7 \times 10^{-29}$ | $2.9 \times 10^{-28}$ | $6.7 \times 10^{-28}$ | $8.2 \times 10^{-28}$ | $2.2 \times 10^{-27}$ | $5.4 \times 10^{-27}$ |                       |
|                      |                      | C                               | $K_{\text{eq}}^{\text{Path1}}$                    | $7.9 \times 10^{-23}$                      | $7.2 \times 10^{-23}$ | $6.6 \times 10^{-23}$ | $5.7 \times 10^{-23}$ | $4.9 \times 10^{-23}$ | $4.3 \times 10^{-23}$ | $3.0 \times 10^{-23}$ | $2.5 \times 10^{-23}$ | $1.7 \times 10^{-23}$ | $1.5 \times 10^{-23}$ | $1.3 \times 10^{-23}$ | $1.3 \times 10^{-23}$ | $1.1 \times 10^{-23}$ | $1.0 \times 10^{-23}$ |                       |
|                      |                      |                                 | $k_{\text{uni}}^{\text{Path1}}$                   | $7.3 \times 10^{-22}$                      | $6.1 \times 10^{-22}$ | $5.1 \times 10^{-22}$ | $3.9 \times 10^{-22}$ | $2.9 \times 10^{-22}$ | $2.2 \times 10^{-22}$ | $1.1 \times 10^{-22}$ | $7.9 \times 10^{-23}$ | $3.7 \times 10^{-23}$ | $2.7 \times 10^{-23}$ | $2.1 \times 10^{-23}$ | $2.0 \times 10^{-23}$ | $1.5 \times 10^{-23}$ | $1.2 \times 10^{-23}$ |                       |
|                      |                      |                                 | $k_{\text{bi}}^{\text{Path1}}$                    | $1.3 \times 10^{-10}$                      | $2.5 \times 10^{-10}$ | $4.9 \times 10^{-10}$ | $1.4 \times 10^{-9}$  | $4.8 \times 10^{-9}$  | $1.3 \times 10^{-8}$  | $1.8 \times 10^{-7}$  | $7.6 \times 10^{-7}$  | $1.5 \times 10^{-5}$  | $5.5 \times 10^{-5}$  | $1.4 \times 10^{-4}$  | $1.8 \times 10^{-4}$  | $5.4 \times 10^{-4}$  | $1.5 \times 10^{-3}$  |                       |
|                      | H <sub>2</sub> O-cat | $K_{\text{eq}}^{\text{Path1}}$  | $7.4 \times 10^{-23}$                             | $1.1 \times 10^{-23}$                      | $1.7 \times 10^{-23}$ | $3.2 \times 10^{-23}$ | $6.7 \times 10^{-23}$ | $1.2 \times 10^{-22}$ | $6.2 \times 10^{-22}$ | $1.5 \times 10^{-21}$ | $9.9 \times 10^{-21}$ | $2.2 \times 10^{-20}$ | $4.0 \times 10^{-20}$ | $4.7 \times 10^{-20}$ | $9.5 \times 10^{-20}$ | $1.8 \times 10^{-19}$ |                       |                       |
|                      |                      | $k_{\text{uni}}^{\text{Path2}}$ | $7.5 \times 10^{-24}$                             | $6.7 \times 10^{-24}$                      | $6.1 \times 10^{-24}$ | $5.2 \times 10^{-24}$ | $4.3 \times 10^{-24}$ | $3.7 \times 10^{-24}$ | $2.5 \times 10^{-24}$ | $2.0 \times 10^{-24}$ | $1.3 \times 10^{-24}$ | $1.1 \times 10^{-24}$ | $9.5 \times 10^{-25}$ | $9.2 \times 10^{-25}$ | $7.9 \times 10^{-25}$ | $6.8 \times 10^{-25}$ |                       |                       |
|                      |                      | $k_{\text{bi}}^{\text{Path2}}$  | $7.7 \times 10^{-24}$                             | $6.5 \times 10^{-24}$                      | $5.6 \times 10^{-24}$ | $4.3 \times 10^{-24}$ | $3.3 \times 10^{-24}$ | $2.6 \times 10^{-24}$ | $1.4 \times 10^{-24}$ | $9.9 \times 10^{-25}$ | $5.0 \times 10^{-25}$ | $3.7 \times 10^{-25}$ | $3.0 \times 10^{-25}$ | $2.9 \times 10^{-25}$ | $2.2 \times 10^{-25}$ | $1.8 \times 10^{-25}$ |                       |                       |
|                      | G                    | $K_{\text{eq}}^{\text{Path2}}$  | $7.4 \times 10^{-23}$                             | $1.1 \times 10^{-23}$                      | $1.7 \times 10^{-23}$ | $3.2 \times 10^{-23}$ | $6.7 \times 10^{-23}$ | $1.2 \times 10^{-22}$ | $6.2 \times 10^{-22}$ | $1.5 \times 10^{-21}$ | $9.9 \times 10^{-21}$ | $2.2 \times 10^{-20}$ | $4.0 \times 10^{-20}$ | $4.7 \times 10^{-20}$ | $9.5 \times 10^{-20}$ | $1.8 \times 10^{-19}$ |                       |                       |
|                      |                      | $k_{\text{uni}}^{\text{Path2}}$ | $7.3 \times 10^{-22}$                             | $6.1 \times 10^{-22}$                      | $5.1 \times 10^{-22}$ | $3.9 \times 10^{-22}$ | $2.9 \times 10^{-22}$ | $2.2 \times 10^{-22}$ | $1.1 \times 10^{-22}$ | $7.9 \times 10^{-23}$ | $3.7 \times 10^{-23}$ | $2.7 \times 10^{-23}$ | $2.1 \times 10^{-23}$ | $2.0 \times 10^{-23}$ | $1.5 \times 10^{-23}$ | $1.2 \times 10^{-23}$ |                       |                       |
|                      |                      | $k_{\text{bi}}^{\text{Path2}}$  | $1.3 \times 10^{-10}$                             | $2.5 \times 10^{-10}$                      | $4.9 \times 10^{-10}$ | $1.4 \times 10^{-9}$  | $4.8 \times 10^{-9}$  | $1.3 \times 10^{-8}$  | $1.8 \times 10^{-7}$  | $7.6 \times 10^{-7}$  | $1.5 \times 10^{-5}$  | $5.5 \times 10^{-5}$  | $1.4 \times 10^{-4}$  | $1.8 \times 10^{-4}$  | $5.4 \times 10^{-4}$  | $1.5 \times 10^{-3}$  |                       |                       |
|                      | NH <sub>3</sub> -cat | D                               | $K_{\text{eq}}^{\text{Path1}}$                    | $7.4 \times 10^{-23}$                      | $1.1 \times 10^{-23}$ | $1.7 \times 10^{-23}$ | $3.2 \times 10^{-23}$ | $6.7 \times 10^{-23}$ | $1.2 \times 10^{-22}$ | $6.2 \times 10^{-22}$ | $1.5 \times 10^{-21}$ | $9.9 \times 10^{-21}$ | $2.2 \times 10^{-20}$ | $4.0 \times 10^{-20}$ | $4.7 \times 10^{-20}$ | $9.5 \times 10^{-20}$ | $1.8 \times 10^{-19}$ |                       |
|                      |                      |                                 | $k_{\text{uni}}^{\text{Path1}}$                   | $6.3 \times 10^{-20}$                      | $5.0 \times 10^{-20}$ | $4.0 \times 10^{-20}$ | $2.8 \times 10^{-20}$ | $1.8 \times 10^{-20}$ | $1.3 \times 10^{-20}$ | $5.4 \times 10^{-21}$ | $3.3 \times 10^{-21}$ | $1.2 \times 10^{-21}$ | $7.9 \times 10^{-22}$ | $5.7 \times 10^{-22}$ | $3.7 \times 10^{-22}$ | $2.6 \times 10^{-22}$ |                       |                       |
|                      |                      |                                 | $k_{\text{bi}}^{\text{Path1}}$                    | $3.3 \times 10^{-11}$                      | $6.6 \times 10^{-11}$ | $1.3 \times 10^{-10}$ | $3.9 \times 10^{-10}$ | $1.4 \times 10^{-9}$  | $3.7 \times 10^{-9}$  | $5.8 \times 10^{-8}$  | $2.6 \times 10^{-7}$  | $5.8 \times 10^{-6}$  | $2.2 \times 10^{-5}$  | $5.8 \times 10^{-5}$  | $7.4 \times 10^{-5}$  | $2.3 \times 10^{-4}$  | $6.8 \times 10^{-4}$  |                       |
|                      |                      | H                               | $K_{\text{eq}}^{\text{Path2}}$                    | $1.6 \times 10^{-22}$                      | $2.4 \times 10^{-22}$ | $3.4 \times 10^{-22}$ | $6.2 \times 10^{-22}$ | $1.2 \times 10^{-21}$ | $2.1 \times 10^{-21}$ | $9.5 \times 10^{-21}$ | $2.2 \times 10^{-20}$ | $1.2 \times 10^{-19}$ | $2.5 \times 10^{-19}$ | $4.4 \times 10^{-19}$ | $5.1 \times 10^{-19}$ | $9.8 \times 10^{-19}$ | $1.8 \times 10^{-18}$ |                       |
|                      |                      |                                 | $k_{\text{uni}}^{\text{Path2}}$                   | $3.4 \times 10^{-20}$                      | $3.0 \times 10^{-20}$ | $2.6 \times 10^{-20}$ | $2.0 \times 10^{-20}$ | $1.6 \times 10^{-20}$ | $1.3 \times 10^{-20}$ | $7.4 \times 10^{-21}$ | $5.5 \times 10^{-21}$ | $2.9 \times 10^{-21}$ | $2.3 \times 10^{-21}$ | $1.9 \times 10^{-21}$ | $1.8 \times 10^{-21}$ | $1.4 \times 10^{-21}$ | $1.2 \times 10^{-21}$ |                       |
|                      |                      |                                 | $k_{\text{bi}}^{\text{Path2}}$                    | $1.5 \times 10^{-22}$                      | $1.2 \times 10^{-22}$ | $1.0 \times 10^{-22}$ | $7.7 \times 10^{-23}$ | $5.6 \times 10^{-23}$ | $4.4 \times 10^{-23}$ | $2.2 \times 10^{-23}$ | $1.5 \times 10^{-23}$ | $7.2 \times 10^{-24}$ | $5.2 \times 10^{-24}$ | $4.1 \times 10^{-24}$ | $3.9 \times 10^{-24}$ | $3.0 \times 10^{-24}$ | $2.3 \times 10^{-24}$ |                       |
|                      | K                    | $K_{\text{eq}}^{\text{Path2}}$  | $3.3 \times 10^{-11}$                             | $6.6 \times 10^{-11}$                      | $1.3 \times 10^{-10}$ | $3.9 \times 10^{-10}$ | $1.4 \times 10^{-9}$  | $3.7 \times 10^{-9}$  | $5.8 \times 10^{-8}$  | $2.6 \times 10^{-7}$  | $5.8 \times 10^{-6}$  | $2.2 \times 10^{-5}$  | $5.8 \times 10^{-5}$  | $7.4 \times 10^{-5}$  | $2.3 \times 10^{-4}$  | $6.8 \times 10^{-4}$  |                       |                       |
|                      |                      | $k_{\text{uni}}^{\text{Path3}}$ | $1.6 \times 10^{-22}$                             | $2.4 \times 10^{-22}$                      | $3.4 \times 10^{-22}$ | $6.2 \times 10^{-22}$ | $1.2 \times 10^{-21}$ | $2.1 \times 10^{-21}$ | $9.5 \times 10^{-21}$ | $2.2 \times 10^{-20}$ | $1.2 \times 10^{-19}$ | $2.5 \times 10^{-19}$ | $4.4 \times 10^{-19}$ | $5.1 \times 10^{-19}$ | $9.8 \times 10^{-19}$ | $1.8 \times 10^{-18}$ |                       |                       |
|                      |                      | $k_{\text{bi}}^{\text{Path3}}$  | $4.9 \times 10^{-22}$                             | $4.4 \times 10^{-22}$                      | $4.0 \times 10^{-22}$ | $3.4 \times 10^{-22}$ | $2.8 \times 10^{-22}$ | $2.4 \times 10^{-22}$ | $1.6 \times 10^{-22}$ | $1.3 \times 10^{-22}$ | $8.5 \times 10^{-23}$ | $7.1 \times 10^{-23}$ | $6.2 \times 10^{-23}$ | $6.0 \times 10^{-23}$ | $5.2 \times 10^{-23}$ | $4.5 \times 10^{-23}$ |                       |                       |
|                      | Ammonolysis          | Uncat                           | B                                                 | $K_{\text{eq}}^{\text{NO}_2+\text{NH}_3}$  | $4.9 \times 10^{-22}$ | $4.4 \times 10^{-22}$ | $4.0 \times 10^{-22}$ | $3.4 \times 10^{-22}$ | $2.8 \times 10^{-22}$ | $2.4 \times 10^{-22}$ | $1.6 \times 10^{-22}$ | $1.3 \times 10^{-22}$ | $8.5 \times 10^{-23}$ | $7.1 \times 10^{-23}$ | $6.2 \times 10^{-23}$ | $6.0 \times 10^{-23}$ | $5.2 \times 10^{-23}$ | $4.5 \times 10^{-23}$ |
|                      |                      |                                 |                                                   | $k_{\text{uni}}^{\text{NO}_2+\text{NH}_3}$ | $2.1 \times 10^{-28}$ | $3.3 \times 10^{-28}$ | $5.0 \times 10^{-28}$ | $9.8 \times 10^{-28}$ | $2.1 \times 10^{-27}$ | $4.0 \times 10^{-27}$ | $2.2 \times 10^{-26}$ | $5.6 \times 10^{-26}$ | $4.0 \times 10^{-25}$ | $9.1 \times 10^{-25}$ | $1.7 \times 10^{-24}$ | $2.8 \times 10^{-24}$ | $4.2 \times 10^{-24}$ | $8.3 \times 10^{-24}$ |
|                      |                      |                                 |                                                   | $k_{\text{bi}}^{\text{NO}_2+\text{NH}_3}$  | $4.9 \times 10^{-22}$ | $4.4 \times 10^{-22}$ | $4.0 \times 10^{-22}$ | $3.4 \times 10^{-22}$ | $2.8 \times 10^{-22}$ | $2.4 \times 10^{-22}$ | $1.6 \times 10^{-22}$ | $1.3 \times 10^{-22}$ | $8.5 \times 10^{-23}$ | $7.1 \times 10^{-23}$ | $6.2 \times 10^{-23}$ | $6.0 \times 10^{-23}$ | $5.2 \times 10^{-23}$ | $4.5 \times 10^{-23}$ |
| H <sub>2</sub> O-cat |                      |                                 | $K_{\text{eq}}^{\text{Path1}}$                    | $4.9 \times 10^{-22}$                      | $4.4 \times 10^{-22}$ | $4.0 \times 10^{-22}$ | $3.4 \times 10^{-22}$ | $2.8 \times 10^{-22}$ | $2.4 \times 10^{-22}$ | $1.6 \times 10^{-22}$ | $1.3 \times 10^{-22}$ | $8.5 \times 10^{-23}$ | $7.1 \times 10^{-23}$ | $6.2 \times 10^{-23}$ | $6.0 \times 10^{-23}$ | $5.2 \times 10^{-23}$ | $4.5 \times 10^{-23}$ |                       |
|                      |                      |                                 | $k_{\text{uni}}^{\text{Path1}}$                   | $2.1 \times 10^{-24}$                      | $1.9 \times 10^{-24}$ | $1.8 \times 10^{-24}$ | $1.5 \times 10^{-24}$ | $1.3 \times 10^{-24}$ | $1.1 \times 10^{-24}$ | $7.9 \times 10^{-25}$ | $6.5 \times 10^{-25}$ | $4.4 \times 10^{-25}$ | $3.8 \times 10^{-25}$ | $3.3 \times 10^{-25}$ | $3.2 \times 10^{-25}$ | $2.8 \times 10^{-25}$ | $2.5 \times 10^{-25}$ |                       |
|                      |                      |                                 | $k_{\text{bi}}^{\text{Path1}}$                    | $2.4 \times 10^{-44}$                      | $3.0 \times 10^{-44}$ | $3.7 \times 10^{-44}$ | $5.2 \times 10^{-44}$ | $7.8 \times 10^{-44}$ | $1.1 \times 10^{-43}$ | $2.0$                 | $4.9$                 | $3.1 \times 10^{11}$  | $6.8 \times 10^{11}$  | $1.2 \times 10^{12}$  | $1.4 \times 10^{12}$  | $2.8 \times 10^{12}$  | $5.9 \times 10^{12}$  |                       |
| L                    |                      | E                               | $K_{\text{eq}}^{\text{Path3}}$                    | $7.9 \times 10^{-23}$                      | $7.2 \times 10^{-23}$ | $6.6 \times 10^{-23}$ | $5.7 \times 10^{-23}$ | $4.9 \times 10^{-23}$ | $4.3 \times 10^{-23}$ | $3.0 \times 10^{-23}$ | $2.5 \times 10^{-23}$ | $1.7 \times 10^{-23}$ | $1.5 \times 10^{-23}$ | $1.3 \times 10^{-23}$ | $1.3 \times 10^{-23}$ | $1.1 \times 10^{-23}$ | $1.0 \times 10^{-23}$ |                       |
|                      |                      |                                 | $k_{\text{uni}}^{\text{Path3}}$                   | $1.5 \times 10^{-22}$                      | $1.2 \times 10^{-22}$ | $1.0 \times 10^{-22}$ | $7.7 \times 10^{-23}$ | $5.6 \times 10^{-23}$ | $4.4 \times 10^{-23}$ | $2.2 \times 10^{-23}$ | $1.5 \times 10^{-23}$ | $7.2 \times 10^{-24}$ | $5.2 \times 10^{-24}$ | $4.1 \times 10^{-24}$ | $3.9 \times 10^{-24}$ | $3.0 \times 10^{-24}$ | $2.3 \times 10^{-24}$ |                       |
|                      |                      |                                 | $k_{\text{bi}}^{\text{Path3}}$                    | $2.1 \times 10^{-24}$                      | $1.9 \times 10^{-24}$ | $1.8 \times 10^{-24}$ | $1.5 \times 10^{-24}$ | $1.3 \times 10^{-24}$ | $1.1 \times 10^{-24}$ | $7.9 \times 10^{-25}$ | $6.5 \times 10^{-25}$ | $4.4 \times 10^{-25}$ | $3.8 \times 10^{-25}$ | $3.3 \times 10^{-25}$ | $3.2 \times 10^{-25}$ | $2.8 \times 10^{-25}$ | $2.5 \times 10^{-25}$ |                       |
|                      |                      | L                               | $K_{\text{eq}}^{\text{Path3}}$                    | $1.3 \times 10^{-23}$                      | $1.2 \times 10^{-23}$ | $1.1 \times 10^{-23}$ | $9.0 \times 10^{-24}$ | $7.4 \times 10^{-24}$ | $6.4 \times 10^{-24}$ | $4.2 \times 10^{-24}$ | $3.4 \times 10^{-24}$ | $2.1 \times 10^{-24}$ | $1.8 \times 10^{-24}$ | $1.5 \times 10^{-24}$ | $1.5 \times 10^{-24}$ | $1.3 \times 10^{-24}$ | $1.1 \times 10^{-24}$ |                       |

**Table S4: Absolute electronic energies, ZPE corrections and thermal corrections to Gibbs free energies at 298 K of all the studied species calculated at M062-X/aug-cc-pVTZ level and absolute electronic energies calculated at the CCSD(T)-F12/cc-pVTZ-F12 level (All values are in Hartree)**

| species                                                           | M06-2X/<br>aug-cc-pVTZ | CCSD(T)-F12/<br>cc-pVTZ-F12 | ZPE correction | Thermal Correction<br>to Gibbs free<br>energy |
|-------------------------------------------------------------------|------------------------|-----------------------------|----------------|-----------------------------------------------|
| $\text{N}_2\text{O}_5$                                            | -485.3410391           | -484.8924455678             | 0.028614       | -0.003024                                     |
| $\text{H}_2\text{O}$                                              | -76.4301065            | -76.3690686602              | 0.021568       | 0.003281                                      |
| $\text{N}_2\text{O}_5\text{-H}_2\text{O}$                         | -561.7793733           | -561.2684322232             | 0.052323       | 0.016059                                      |
| $\text{TS}_{\text{N}_2\text{O}_5\text{-H}_2\text{O}}$             | -561.7483301           | -561.2350520671             | 0.052924       | 0.020086                                      |
| $\text{PC}_{\text{N}_2\text{O}_5\text{-H}_2\text{O}}$             | -561.8055096           | -561.2890183317             | 0.056015       | 0.020095                                      |
| $\text{NH}_3$                                                     | -56.5529773            | -56.4992333118              | 0.034461       | 0.016437                                      |
| $\text{N}_2\text{O}_5\text{-NH}_3$                                | -541.90271             | -541.399327781              | 0.065077       | 0.027841                                      |
| $\text{TS}_{\text{N}_2\text{O}_5\text{-NH}_3}$                    | -541.8785328           | -541.3730895231             | 0.066196       | 0.033004                                      |
| $\text{PC}_{\text{N}_2\text{O}_5\text{-NH}_3}$                    | -541.9487638           | -541.4407112814             | 0.069158       | 0.033235                                      |
| $\text{H}_2\text{O-H}_2\text{O}$                                  | -152.8684533           | -152.7461785266             | 0.046246       | 0.019462                                      |
| $\text{N}_2\text{O}_5\text{-H}_2\text{O-H}_2\text{O}$             | -638.2229489           | -637.6491426847             | 0.077668       | 0.038771                                      |
| $\text{TS}_{\text{N}_2\text{O}_5\text{-H}_2\text{O-H}_2\text{O}}$ | -638.1922511           | -637.6155447186             | 0.078035       | 0.041492                                      |
| $\text{PC}_{\text{N}_2\text{O}_5\text{-H}_2\text{O-H}_2\text{O}}$ | -638.2541885           | -637.6759595381             | 0.080282       | 0.037876                                      |
| $\text{H}_2\text{O-NH}_3$                                         | -132.9934913           | -132.8786032747             | 0.05975        | 0.033588                                      |
| $\text{N}_2\text{O}_5\text{-H}_2\text{O-NH}_3$                    | -618.347734            | -617.7819992844             | 0.090291       | 0.050857                                      |
| $\text{TS}_{\text{N}_2\text{O}_5\text{-H}_2\text{O-NH}_3}$        | -618.3158826           | -617.7469605518             | 0.090341       | 0.053045                                      |
| $\text{PC}_{\text{N}_2\text{O}_5\text{-H}_2\text{O-NH}_3}$        | -618.3865156           | -617.8132294929             | 0.091856       | 0.051932                                      |
| $\text{N}_2\text{O}_5\text{-NH}_3\text{-H}_2\text{O}$             | -618.3420052           | -617.7757611199             | 0.089792       | 0.050203                                      |
| $\text{TS}_{\text{N}_2\text{O}_5\text{-NH}_3\text{-H}_2\text{O}}$ | -618.3232332           | -617.7557038079             | 0.090962       | 0.05359                                       |
| $\text{PC}_{\text{N}_2\text{O}_5\text{-NH}_3\text{-H}_2\text{O}}$ | -618.397504            | -617.8264789812             | 0.093433       | 0.052516                                      |
| $\text{HNO}_3$                                                    | -280.897309            | -280.6397316791             | 0.027324       | 0.001649                                      |
| $\text{H}_2\text{NNO}_2$                                          | -261.0437181           | -260.7922358664             | 0.040176       | 0.014415                                      |

**Table S5: Optimized geometries in Cartesian coordinates and normal mode frequencies of all species calculated at M06-2X/aug-cc-pVTZ level of theory**

| Compound name                                           | Cartesian Coordinate (Å)              | Frequencies (cm <sup>-1</sup> ) |
|---------------------------------------------------------|---------------------------------------|---------------------------------|
| N <sub>2</sub> O <sub>5</sub>                           | N 1.18199200 0.08759300 -0.00054000   | 28.2799 92.8072 220.7528        |
|                                                         | O 0.10751900 -0.86124400 0.00428100   | 417.0931 585.3173 592.4012      |
|                                                         | N -1.18689600 -0.14072200 0.00076700  | 743.2918 781.4948 788.2113      |
|                                                         | O -1.60364400 0.05902000 -1.08217000  | 876.5777 952.2245 1346.2875     |
|                                                         | O -1.60284900 0.07087700 1.08182700   | 1452.6455 1825.1394 1857.4647   |
|                                                         | O 2.22804500 -0.45583200 0.00229600   |                                 |
|                                                         | O 0.87522000 1.23366700 -0.00643400   |                                 |
| H <sub>2</sub> O                                        | H 0.76224900 -0.46549300 0.00000000   | 1619.0379 3872.6446 3975.5558   |
|                                                         | H -0.76224900 -0.46550800 0.00000000  |                                 |
|                                                         | O 0.00000000 0.11637500 0.00000000    |                                 |
| N <sub>2</sub> O <sub>5</sub> -H <sub>2</sub> O         | N 0.79094700 -0.84056200 0.07446500   | 36.9832 73.1319 98.8233         |
|                                                         | O -0.19988300 -0.32637600 -0.86943000 | 111.6285 123.5872 158.1398      |
|                                                         | N -1.35685200 0.15678900 -0.14662000  | 192.1961 227.6224 282.4412      |
|                                                         | O -1.36087400 1.33241400 0.01744900   | 440.7437 543.6416 610.2360      |
|                                                         | O -2.14436200 -0.67695500 0.13091000  | 750.4199 772.4144 787.6280      |
|                                                         | O 1.72099200 -1.26217200 -0.50118200  | 882.8424 954.3818 1350.0244     |
|                                                         | O 0.50281100 -0.76421800 1.21732200   | 1455.8566 1614.5989 1822.5384   |
|                                                         | H 0.76551200 2.19303500 -0.05055100   | 1864.3172 3854.4214 3958.7233   |
|                                                         | H 2.15439500 2.25821300 0.59653000    |                                 |
| O 1.61149500 1.73920300 -0.00018100                     |                                       |                                 |
| TS <sub>N<sub>2</sub>O<sub>5</sub>-H<sub>2</sub>O</sub> | N 1.42183500 -0.37571200 0.22208600   | -398.5305 68.7299 92.2251       |
|                                                         | O -0.53748400 -0.80438600 -0.50904500 | 187.7550 237.3158 256.0706      |
|                                                         | N -1.50383800 -0.10524500 -0.06415700 | 357.7494 367.0496 505.4401      |
|                                                         | O -1.24318600 1.07045600 0.31678700   | 549.8486 626.2006 729.2212      |
|                                                         | O -2.61415400 -0.55277300 -0.01551700 | 738.0877 767.8946 867.3935      |
|                                                         | O 1.98547400 -0.89932700 -0.61250100  | 1109.4532 1210.1045 1305.5483   |
|                                                         | O 1.22563300 -0.22316800 1.32761700   | 1405.0638 1634.2111 1654.5685   |
|                                                         | O 1.10437100 1.46898100 -0.44943100   | 2184.0223 2523.9832 3853.0210   |
|                                                         | H 1.09545900 1.45179400 -1.41378800   |                                 |
| H 0.11332600 1.43663700 -0.15500100                     |                                       |                                 |
| PC <sub>N<sub>2</sub>O<sub>5</sub>-H<sub>2</sub>O</sub> | N -1.76034700 0.09069700 0.05024000   | 32.5549 47.6681 66.7683         |
|                                                         | O 0.88780200 -0.88539500 0.44533900   | 118.5113 144.0617 153.0002      |
|                                                         | N 1.79332200 -0.16896600 0.09317600   | 469.4354 618.6037 640.5070      |
|                                                         | O 1.48332000 1.13917600 -0.13654000   | 658.6997 714.3825 716.0993      |
|                                                         | O 2.93350300 -0.44844600 -0.08448500  | 826.1575 831.2193 1001.2081     |
|                                                         | O -1.31394400 1.11839300 0.47760600   | 1007.5428 1357.2843 1395.9291   |
|                                                         | O -2.46137700 -0.70673400 0.58906900  | 1420.3430 1432.0370 1790.9796   |
|                                                         | H 0.52521700 1.21119700 0.05115800    | 1798.0606 3581.1986 3765.4100   |
|                                                         | H -1.75042300 -1.05897800 -1.41597900 |                                 |
|                                                         | O -1.40500700 -0.16753600 -1.24587500 |                                 |
| NH <sub>3</sub>                                         | H 0.00000000 0.94022800 -0.26212800   | 1037.1992 1661.5762 1661.6067   |
|                                                         | H 0.81426100 -0.47011400 -0.26212800  | 3505.0582 3630.4754 3630.5023   |
|                                                         | N 0.00000000 0.00000000 0.11234100    |                                 |
|                                                         | H -0.81426100 -0.47011400 -0.26212800 |                                 |

|                    |                                                                                                                                                                                                                                                                                                                                                                                                                                                                                                                                 |                                                                                                                                                                                                                                                                                                                                                |
|--------------------|---------------------------------------------------------------------------------------------------------------------------------------------------------------------------------------------------------------------------------------------------------------------------------------------------------------------------------------------------------------------------------------------------------------------------------------------------------------------------------------------------------------------------------|------------------------------------------------------------------------------------------------------------------------------------------------------------------------------------------------------------------------------------------------------------------------------------------------------------------------------------------------|
| $N_2O_5-NH_3$      | N 0.67630800 -0.91601700 0.05917900<br>O -0.25898300 -0.30015400 -0.87238500<br>N -1.37719400 0.27411100 -0.14613800<br>O -1.32091700 1.45260100 -0.04775300<br>O -2.19405300 -0.50921600 0.19179900<br>O 1.55743000 -1.42563900 -0.52653200<br>O 0.41023600 -0.82078600 1.20502300<br>H 2.54479400 1.76129500 -0.66198500<br>H 1.12195000 2.25522800 -0.03734700<br>N 1.90184300 1.62534600 0.10808000<br>H 2.37686600 1.92493600 0.95026700                                                                                   | 29.2779 50.1409 77.2394<br>93.2566 114.4233 155.5741<br>210.9316 224.4227 235.2078<br>439.8775 539.4015 621.4440<br>751.3980 764.6252 790.1826<br>881.7804 955.8520 1060.8639<br>1352.0798 1458.3358 1654.5852<br>1661.1976 1829.2720 1866.3828<br>3499.8639 3620.5914 3627.2143                                                               |
| $TS_{N_2O_5-NH_3}$ | N 1.25158700 -0.43021500 0.23772600<br>O -0.46724900 -0.62028600 -0.63421500<br>N -1.48786300 -0.02626800 -0.07372800<br>O -1.28478700 1.05680400 0.47666400<br>O -2.55824900 -0.56503600 -0.14017700<br>O 1.89198100 -1.08296700 -0.46911900<br>O 1.04978300 -0.25576700 1.36144500<br>H 1.26519400 1.29764000 -1.56019800<br>H 0.36355800 1.71469800 -0.20743100<br>N 1.27689000 1.41518500 -0.55483000<br>H 2.03511900 2.01476900 -0.25333800                                                                                | -332.9944 56.8431 119.6872<br>184.8080 195.2344 260.4139<br>280.9289 294.2622 379.9733<br>515.1316 631.4012 681.6145<br>733.4846 752.4389 775.8772<br>865.2859 1068.9135 1081.0813<br>1323.6947 1403.9564 1588.1022<br>1636.5296 1660.7168 1975.8123<br>3372.8181 3571.4483 3646.0536                                                          |
| $PC_{N_2O_5-NH_3}$ | N 1.83123200 -0.11681700 0.00014300<br>O -0.93988100 -0.93507700 -0.00048100<br>N -1.86279800 -0.16109000 -0.00006100<br>O -1.53280500 1.16642000 -0.00002200<br>O -3.02913400 -0.38612100 0.00025900<br>O 1.98188600 -0.61610000 -1.08076600<br>O 1.98124000 -0.61543300 1.08145300<br>H 1.71582900 1.66146200 -0.84897300<br>H -0.54915800 1.16926700 -0.00036600<br>N 1.37832400 1.22043700 -0.00039300<br>H 1.71557000 1.66205600 0.84798100                                                                                | 28.7709 56.3912 82.9660<br>99.2710 132.0495 175.8425<br>423.3716 579.3537 649.4682<br>693.8788 720.3911 775.4946<br>809.2225 833.3981 910.7104<br>1003.2038 1052.0872 1265.9850<br>1408.0477 1441.8253 1467.1970<br>1605.7262 1762.9768 1806.7216<br>3459.5117 3499.7360 3613.4516                                                             |
| $H_2O-H_2O$        | O 1.50451400 0.00135300 -0.12144400<br>H 0.55692600 -0.00147000 0.06744400<br>H 1.93822400 -0.00834400 0.73306200<br>O -1.38712700 -0.00116000 0.11250200<br>H -1.71579700 0.76942800 -0.35691400<br>H -1.71844600 -0.76115900 -0.37205700                                                                                                                                                                                                                                                                                      | 91.9787 127.6528 136.3411<br>191.2977 357.1927 605.1494<br>1619.2227 1635.9396 3771.8085<br>3859.9575 3943.8452 3959.1887                                                                                                                                                                                                                      |
| $N_2O_5-H_2O-H_2O$ | N -0.63352200 -1.24922000 -0.26739200<br>O -0.24876500 0.00072200 -0.92851700<br>N -0.62584600 1.25274700 -0.26742300<br>O 0.20679300 2.06411900 -0.49138800<br>O -1.64987800 1.29842000 0.30034500<br>O 0.19434900 -2.06543600 -0.49116600<br>O -1.65799300 -1.28880900 0.30003100<br>H 1.57552300 -0.00434600 1.29565600<br>H 0.77929700 -0.00135700 2.63401600<br>O 0.68431600 -0.00213400 1.68072500<br>O 2.69850800 -0.00767200 -0.22435000<br>H 2.32377900 0.75599300 -0.67571700<br>H 2.31833500 -0.76866000 -0.67568800 | 37.8304 65.4595 100.1029<br>106.9919 119.1838 142.6631<br>160.3572 190.5239 206.1891<br>231.1331 251.7611 265.7848<br>306.8741 380.8034 442.3833<br>496.2274 667.8648 722.8845<br>741.3627 776.1475 788.8715<br>853.2873 934.5402 1352.1554<br>1442.9757 1609.5701 1630.0238<br>1813.6645 1885.2004 3680.5670<br>3829.2817 3913.6915 3945.8149 |



|                                                                        |                                                                                                                                                                                                                                                                                                                                                                                                                                                                                                                                                                     |                                                                                                                                                                                                                                                                                                                                                                                |
|------------------------------------------------------------------------|---------------------------------------------------------------------------------------------------------------------------------------------------------------------------------------------------------------------------------------------------------------------------------------------------------------------------------------------------------------------------------------------------------------------------------------------------------------------------------------------------------------------------------------------------------------------|--------------------------------------------------------------------------------------------------------------------------------------------------------------------------------------------------------------------------------------------------------------------------------------------------------------------------------------------------------------------------------|
| TS <sub>N<sub>2</sub>O<sub>5</sub>-H<sub>2</sub>O-H<sub>2</sub>O</sub> | N 1.45478600 -0.50041800 0.26148800<br>O -0.37973000 -0.35526400 -0.98504900<br>N -1.34929300 -0.69825200 -0.23724400<br>O -2.26361500 0.12557100 -0.05342400<br>O -1.33690800 -1.78807300 0.30319500<br>O 2.11669500 -1.02996000 -0.49218100<br>O 0.98198900 -0.45874900 1.29082100<br>H 0.64147700 1.75485000 -0.01063800<br>H 1.52989000 1.30838900 -1.22771600<br>H -1.01842200 2.73343500 1.00183100<br>H -1.40872600 1.56608100 0.01832000<br>O -0.74008200 2.27706800 0.20531200<br>O 1.56131800 1.35789800 -0.26261300                                      | -257.5737 49.3886 59.1051<br>107.4274 127.8338 152.8103<br>218.9554 245.1174 254.9512<br>279.1569 353.8807 426.1612<br>452.2510 527.8641 603.3941<br>652.1150 731.4720 745.5019<br>805.7757 853.6740 906.1019<br>1123.6966 1195.1961 1377.6714<br>1410.9542 1562.0416 1648.2975<br>1687.2609 2185.5678 2551.4236<br>3211.5926 3824.9343 3921.7916                              |
| PC <sub>N<sub>2</sub>O<sub>5</sub>-H<sub>2</sub>O-H<sub>2</sub>O</sub> | N 2.52734300 -0.33866100 -0.02079600<br>O -1.08554000 -0.83186600 0.08849700<br>N -2.26823100 -0.55262700 -0.01145700<br>O -2.59349100 0.74737200 -0.00762500<br>O -3.17188100 -1.31406600 -0.10737600<br>O 2.41266600 -1.46804600 0.35513100<br>O 3.49333800 0.34955600 -0.09429000<br>H 0.38083200 1.90824900 0.06532000<br>H 0.63969900 -0.36043700 -0.27872900<br>H -0.52436800 3.15817700 -0.10359800<br>H -1.74145600 1.27137400 0.09501400<br>O -0.49182500 2.27201500 0.26476900<br>O 1.36567100 0.27774100 -0.44313500                                     | 11.7102 29.0999 36.2760<br>53.5126 73.4677 82.0148<br>159.9531 172.7508 193.7376<br>247.5720 381.4936 513.5638<br>644.6904 650.5776 689.5726<br>717.6500 733.3747 827.1861<br>833.1177 901.1293 979.0128<br>1052.5335 1348.0405 1410.0164<br>1417.9455 1508.2902 1623.4220<br>1790.1002 1804.1091 3050.1331<br>3591.7562 3785.7914 3925.9852                                   |
| H <sub>2</sub> O-NH <sub>3</sub>                                       | H 0.58747600 0.04947200 0.00043800<br>H 1.95085100 0.76407100 0.00086300<br>N -1.38202900 0.02335000 0.00003800<br>H -1.63076800 -0.65790800 -0.70666000<br>H -1.91959500 0.86056600 -0.18564700<br>H -1.69025400 -0.34296400 0.89221300<br>O 1.54706200 -0.10458600 -0.00018400                                                                                                                                                                                                                                                                                    | 128.5959 169.9395 197.8604<br>204.4608 449.0967 691.0014<br>1081.3299 1649.2507 1656.0936<br>1664.0428 3501.6163 3621.8514<br>3631.4719 3633.3270 3947.2654                                                                                                                                                                                                                    |
| N <sub>2</sub> O <sub>5</sub> -H <sub>2</sub> O-NH <sub>3</sub>        | N -0.64822600 -1.25675800 -0.26684600<br>O -0.24175100 -0.00146500 -0.90199700<br>N -0.66279400 1.25021000 -0.26733000<br>O 0.14146100 2.08368900 -0.50830200<br>O -1.68904800 1.27597500 0.29929900<br>O 0.16480300 -2.08176900 -0.50803600<br>O -1.67358600 -1.29371800 0.30102900<br>H 1.54366000 0.00934700 1.23376500<br>H 0.81473600 0.00147100 2.61958200<br>O 0.66762700 0.00571700 1.67343900<br>H 3.75553000 0.01738100 -0.16024900<br>H 2.45210600 -0.80433500 -0.71817500<br>N 2.74432100 0.01278400 -0.19393100<br>H 2.44481500 0.82504800 -0.72162500 | 55.3570 57.8238 85.2233<br>101.5799 108.0799 114.2372<br>129.0893 134.1062 205.4646<br>241.4800 258.0960 265.0778<br>271.6945 376.7048 437.2808<br>525.8963 694.8924 745.6926<br>771.3609 787.0090 793.1296<br>849.0096 934.5850 1103.6044<br>1353.4786 1445.9060 1633.3341<br>1645.9983 1658.9750 1812.7930<br>1884.6134 3458.3873 3500.4226<br>3613.2157 3632.6287 3946.7868 |

|                                                                        |                                                                                                                                                                                                                                                                                                                                                                                                                                                                                                                                                                           |                                                                                                                                                                                                                                                                                                                                                                                   |
|------------------------------------------------------------------------|---------------------------------------------------------------------------------------------------------------------------------------------------------------------------------------------------------------------------------------------------------------------------------------------------------------------------------------------------------------------------------------------------------------------------------------------------------------------------------------------------------------------------------------------------------------------------|-----------------------------------------------------------------------------------------------------------------------------------------------------------------------------------------------------------------------------------------------------------------------------------------------------------------------------------------------------------------------------------|
| TS <sub>N<sub>2</sub>O<sub>5</sub>-H<sub>2</sub>O-NH<sub>3</sub></sub> | N 1.40070300 -0.52944900 0.24263000<br>O -0.37769900 -0.36557000 -0.95453900<br>N -1.38287400 -0.69121000 -0.22704900<br>O -2.35795700 0.06072300 -0.21925300<br>O -1.31402700 -1.70522800 0.44705700<br>O 2.04034500 -1.15846500 -0.45988800<br>O 0.98320100 -0.39697900 1.29494400<br>H 0.71581600 1.74968400 -0.07711500<br>H 1.46999100 1.11920400 -1.34812400<br>O 1.61138100 1.26143800 -0.40243200<br>H -0.73365500 2.43186600 1.34386600<br>H -0.74203800 3.30311100 -0.03487900<br>N -0.59766000 2.37316700 0.34084300<br>H -1.33325000 1.76122600 -0.02582600   | -342.3539 34.6689 55.1938<br>97.1706 139.9642 149.6044<br>178.0628 212.1884 238.6308<br>253.3739 360.9010 380.0445<br>435.8327 494.2561 534.4772<br>641.0962 667.8717 731.6867<br>746.1156 862.5984 880.8737<br>1112.6033 1240.1434 1320.1527<br>1373.1732 1406.9899 1567.7204<br>1644.0786 1668.8957 1719.6289<br>2003.7889 2132.6433 3380.9627<br>3553.5229 3613.4214 3822.5846 |
| PC <sub>N<sub>2</sub>O<sub>5</sub>-H<sub>2</sub>O-NH<sub>3</sub></sub> | N 1.93504000 -0.62481300 -0.01682900<br>O -1.45106100 -1.19195400 0.25604400<br>N -2.21196600 -0.13897000 -0.06680500<br>O -1.67213500 0.95391300 -0.08936100<br>O -3.35383000 -0.37346000 -0.30030900<br>O 2.01820300 -1.81551700 -0.13412600<br>O 2.72820800 0.19380800 -0.45917200<br>H 0.85571000 1.19009200 0.39863800<br>H -0.51610600 -0.84106300 0.41228400<br>O 0.89669200 -0.14127800 0.64235700<br>H 0.93793100 2.93668300 0.86442300<br>H 1.59979500 2.43144200 -0.57343800<br>N 0.82826900 2.30710700 0.07689900<br>H -0.06535000 2.47546800 -0.37822400     | 25.4632 48.1952 65.0512<br>81.1307 87.7660 96.8193<br>137.7130 145.7387 200.9865<br>368.6779 423.4115 497.6927<br>666.9439 726.5386 745.8115<br>754.3619 839.0703 855.3238<br>969.6899 974.7292 1047.5317<br>1133.6150 1338.2995 1397.2863<br>1485.8593 1534.6117 1555.6413<br>1601.2838 1653.5412 1684.0362<br>1775.1228 1783.3408 2958.5292<br>3473.7982 3582.9189 3603.3912    |
| N <sub>2</sub> O <sub>5</sub> -NH <sub>3</sub> -H <sub>2</sub> O       | N 0.62244200 1.23916200 -0.28876500<br>O 0.25190700 0.00198100 -0.97369100<br>N 0.63127100 -1.23338500 -0.29225900<br>O -0.23291500 -2.03290600 -0.42553800<br>O 1.69259500 -1.28932000 0.20417200<br>O -0.24882800 2.03148700 -0.41811900<br>O 1.68430500 1.30247900 0.20525900<br>H -2.27980800 0.75507500 -0.69312200<br>H -2.27974500 -0.76353700 -0.69910600<br>O -2.76411000 -0.00558300 -0.35801200<br>N -0.65027000 -0.00931900 1.87706000<br>H -0.56897700 0.80027600 2.48088300<br>H -0.56753500 -0.82313800 2.47500100<br>H -1.59165900 -0.00897800 1.49152700 | 52.4940 63.5756 91.5899<br>99.5316 107.9689 132.1145<br>134.4163 162.5480 166.0824<br>195.4622 235.2140 254.5906<br>291.0229 333.7798 400.6456<br>455.3259 464.8162 694.0314<br>729.3039 769.6984 785.9151<br>856.5022 937.3191 1119.4114<br>1351.7737 1443.5974 1632.6535<br>1655.1722 1674.2217 1808.2341<br>1876.4048 3468.9984 3586.0327<br>3616.6221 3841.3006 3925.6641     |

|                                                                        |                                                                                                                                                                                                                                                                                                                                                                                                                                                                                                                                                                       |                                                                                                                                                                                                                                                                                                                                                                                   |
|------------------------------------------------------------------------|-----------------------------------------------------------------------------------------------------------------------------------------------------------------------------------------------------------------------------------------------------------------------------------------------------------------------------------------------------------------------------------------------------------------------------------------------------------------------------------------------------------------------------------------------------------------------|-----------------------------------------------------------------------------------------------------------------------------------------------------------------------------------------------------------------------------------------------------------------------------------------------------------------------------------------------------------------------------------|
| TS <sub>N<sub>2</sub>O<sub>5</sub>-NH<sub>3</sub>-H<sub>2</sub>O</sub> | N 1.40882700 -0.37925500 0.19283100<br>O -0.23942800 -0.23840700 -0.80657600<br>N -1.19814400 -0.89425900 -0.20980800<br>O -2.29710800 -0.35679300 -0.19776800<br>O -0.94307600 -1.96314300 0.29291500<br>O 2.14535500 -0.87066600 -0.54759600<br>O 1.10696500 -0.39456700 1.30667700<br>H 0.53843200 1.96703000 0.03205400<br>H 1.48113300 1.63889200 -1.29892200<br>H -1.88692800 2.71889200 0.88089100<br>H -1.74635700 1.48351500 -0.03223500<br>O -1.29610500 2.29519800 0.25596900<br>N 1.44314200 1.60404600 -0.28728100<br>H 2.22413200 2.10497800 0.11904200 | -293.6234 44.3646 58.4279<br>101.1800 146.0630 166.7639<br>177.5418 188.3378 227.5679<br>269.6067 273.9470 306.5712<br>374.1266 401.5343 531.6871<br>605.9715 642.7092 675.1613<br>730.4639 738.0302 762.5733<br>871.2172 1075.6719 1150.1101<br>1331.6904 1415.0806 1606.3304<br>1630.2595 1640.8663 1658.5398<br>1982.7090 3332.2401 3558.1492<br>3637.5104 3681.1306 3933.5002 |
| PC <sub>N<sub>2</sub>O<sub>5</sub>-NH<sub>3</sub>-H<sub>2</sub>O</sub> | N -2.03279500 -0.46765900 -0.12392900<br>O 1.35094200 -1.31336500 0.15993100<br>N 2.21757200 -0.28769800 -0.02788500<br>O 1.80615500 0.82091400 0.23571800<br>O 3.29095600 -0.59604900 -0.42706100<br>O -2.82633600 -1.34123800 0.11048400<br>O -1.88963200 0.12564000 -1.16744300<br>H -0.90285600 0.86816100 0.80025700<br>H 0.50615600 -0.89302500 0.46077000<br>H -0.95424100 2.41090600 -0.73212100<br>H 0.37555800 2.48803200 0.02323300<br>H -1.55500800 -0.40723600 1.77748900<br>N -1.14102100 -0.13408600 0.89418800<br>O -0.57907100 2.52400600 0.14759000 | 21.0015 33.3145 61.5327<br>78.8076 89.0028 99.5290<br>129.1304 162.3536 186.4513<br>231.8678 396.0910 411.7226<br>579.8831 617.4022 660.2243<br>709.2027 718.6611 794.2679<br>832.3755 861.8671 957.9819<br>1021.5112 1097.7551 1320.7109<br>1408.5977 1439.8318 1466.8840<br>1630.6496 1634.6633 1738.0789<br>1793.9901 3172.4650 3324.2499<br>3589.9368 3827.4569 3912.9470     |
| HNO <sub>3</sub>                                                       | O -0.13761800 1.23667000 -0.00005100<br>N -0.14091200 0.03554900 0.00015300<br>O 1.09921400 -0.56803900 0.00000800<br>O -1.05286200 -0.72221200 -0.00008900<br>H 1.71651700 0.17980100 -0.00001500                                                                                                                                                                                                                                                                                                                                                                    | 494.9714 622.1574 706.4552<br>828.6038 980.7984 1354.1493<br>1418.3041 1813.0459 3775.4210                                                                                                                                                                                                                                                                                        |
| NH <sub>2</sub> NO <sub>2</sub>                                        | N 0.14124000 0.00000000 -0.00423700<br>O 0.67879100 1.08124300 0.00813300<br>O 0.67879300 -1.08124200 0.00813300<br>H -1.60492800 0.86125600 0.28071100<br>N -1.23421500 -0.00000100 -0.09455500<br>H -1.60492700 -0.86125900 0.28071200                                                                                                                                                                                                                                                                                                                              | 446.7197 592.7632 631.8077<br>746.0942 839.9629 1063.8739<br>1257.4458 1455.9779 1613.1144<br>1735.7592 3558.3747 3693.1584                                                                                                                                                                                                                                                       |

**Table S6: Comparison of important geometrical parameters (bond length in Å and bond angle in deg) and frequencies (cm<sup>-1</sup>) obtained at M06-2X/aug-cc-pVTZ level of theory with experimental results available in literature**

| Species | Geometrical parameters                                                           | Experimental                                                                          |                                                                                                     | This Work                                                                |                                                                                                         |
|---------|----------------------------------------------------------------------------------|---------------------------------------------------------------------------------------|-----------------------------------------------------------------------------------------------------|--------------------------------------------------------------------------|---------------------------------------------------------------------------------------------------------|
|         |                                                                                  | Geometry                                                                              | Frequency (cm <sup>-1</sup> )                                                                       | Geometry                                                                 | Frequency (cm <sup>-1</sup> )                                                                           |
|         | N5-O7<br>N5-O6<br>N5-O4<br>O7-N5-O4<br>N5-O4-N1                                  | 1.188 <sup>a</sup><br>1.188<br>1.498<br>133.2<br>111.8                                | 50.0 85.0 353.0 <sup>b</sup><br>353 614 743<br>743 860 1247<br>1338 1728 1728                       | 1.179<br>1.186<br>1.433<br>132.4<br>109.5                                | 28.3 92.8 220.8<br>417.1 585.3 592.4<br>743.3 781.5 788.2<br>876.6 952.2 1346.3<br>1452.6 1825.1 1857.5 |
|         | O1-H3<br>H2-O1-H3                                                                | 0.958 <sup>c</sup><br>104.48                                                          | 1595.0 3657.0 3756.0 <sup>d</sup>                                                                   | 0.959<br>105.29                                                          | 1619.0 3872.6 3975.6                                                                                    |
|         | N1-H3<br>H3-N1-H2<br>H2-N1-H4                                                    | 1.012 <sup>e</sup><br>106.68<br>112.15                                                | 950.0 1627.0 3337.0 <sup>f</sup><br>3444.0                                                          | 1.012<br>107.14<br>107.14                                                | 1037.2 1661.6 1661.6<br>3505.1 3630.5 3630.5                                                            |
|         | O3-H5<br>O3-N1<br>N1-O4<br>N1-O2<br>H5-O3-N1<br>O3-N1-O4<br>O4-N1-O2<br>O2-N1-O3 | 0.964 <sup>g</sup><br>1.406<br>1.211<br>1.199<br>102.15<br>115.09<br>130.27<br>113.85 | 456.0 579.0 674.0 <sup>h</sup><br>762.0 879.0 1325.0<br>1331.0 1708.0 3550.0                        | 0.969<br>1.379<br>1.201<br>1.186<br>103.59<br>115.80<br>129.88<br>114.32 | 495.0 622.2 706.5<br>828.6 980.8 1354.1<br>1418.3 1813.0 3775.4                                         |
|         | N1-H5<br>N2-O4<br>N1-N2<br>H5-N1-N2<br>N1-N1-O4<br>O4-N2-O3                      | 0.86 <sup>i</sup><br>1.237<br>1.321<br>117.00<br>118.51<br>123.00                     | 434.0 484.0 587.0 <sup>j</sup><br>714.0 776.0 951.0<br>1238.0 1968.0 1581.0<br>1610.0 3361.0 3474.0 | 1.009<br>1.207<br>1.378<br>109.99<br>116.41<br>127.12                    | 446.7 592.8 631.8<br>746.1 840.0 1063.9<br>1257.4 1456.0 1613.1<br>1735.8 3558.4 3693.2                 |

*a*-References-9,10

*b*-References-11 and 12

*c*-Reference-13

*d*-Reference-14

*e*-Reference-15

*f*-Reference-14

*g*-Reference-16

*h*-References-14 and 17

*i*-Reference-18

*j*-Reference-19

## References

- (1) Anglada, J. M.; Hoffman, G. J.; Slipchenko, L. V.; M. Costa, M.; Ruiz-Lopez, M. F.; Francisco, J. S. Atmospheric significance of water clusters and ozone–water complexes. *J. Phys. Chem. A* **2013**, *117*, 10381–10396.
- (2) Orlando, J. J.; Tyndall, G. S.; Brasseur, G. P. *Atmospheric Chemistry and Global Change*; Oxford University Press, 1999.
- (3) Aneja, V. P.; Nelson, D. R.; Roelle, P. A.; Walker, J. T.; Battye, W. Agricultural ammonia emissions and ammonium concentrations associated with aerosols and precipitation in the southeast United States. *J. Geophys. Res. Atmos.* **2003**, *108*.
- (4) Warner, J.; Wei, Z.; Strow, L.; Dickerson, R.; Nowak, J. The global tropospheric ammonia distribution as seen in the 13 year AIRS measurement record. *Atmos. Chem. Phys. Discuss.* **2015**, *15*, 35823–35856.
- (5) Hiranuma, N.; Brooks, S. D.; Thornton, D. C.; Auvermann, B. W. Atmospheric ammonia mixing ratios at an open-air cattle feeding facility. *J. Air Waste Manage. Assoc.* **2010**, *60*, 210–218.
- (6) Nowak, J.; Neuman, J.; Bahreini, R.; Brock, C.; Middlebrook, A.; Wollny, A.; Holloway, J.; Peischl, J.; Ryerson, T.; Fehsenfeld, F. Airborne observations of ammonia and ammonium nitrate formation over Houston, Texas. *J. Geophys. Res. Atmos.* *115*, D22304.
- (7) Oelhaf, H.; Leupolt, A.; Fischer, H. Discrepancies between balloon-borne IR atmospheric spectra and corresponding synthetic spectra calculated line by line around  $825\text{ cm}^{-1}$ . *Appl. Opt.* **1983**, *22*, 647–649.
- (8) Höpfner, M.; Volkamer, R.; Grabowski, U.; Grutter, M.; Orphal, J.; Stiller, G.; Clarmann, T. v.; Wetzell, G. First detection of ammonia ( $\text{NH}_3$ ) in the Asian summer monsoon upper troposphere. *Atmos. Chem. Phys.* **2016**, *16*, 14357–14369.
- (9) McClelland, B. W.; Hedberg, L.; Hedberg, K.; Hagen, K. Molecular structure of  $\text{N}_2\text{O}_5$  in the gas phase. Large amplitude motion in a system of coupled rotors *J. Am. Chem. Soc.* **1983**, *105*, 3789–3793.
- (10) Hillier, J. P.; Hillier, I.H. Structure and reactivity of dinitrogen pentoxide in small water clusters studied by electronic structure calculations *J. Phys. Chem. A* **2000**, *104*, 5307–5319.
- (11) Cantrell, C. A.; Davidson, J.A.; McDaniel, A.H.; Shetter, R.E.; Calvert, J.G. Infrared absorption cross sections for  $\text{N}_2\text{O}_5$  *Chem. Phys. Lett.* **1988**, *148*, 358–363.

- (12) Bencivenni, L.; Sanna, N.; Schriver-Mazzuoli, L.; Schriver, A. Infrared spectrum and theoretical study of the dinitrogen pentoxide molecule ( $\text{N}_2\text{O}_5$ ) in solid argon *J. Chem. Phys.* **1996**, *104*, 7836–7846.
- (13) Hoy, A.R.; Bunker, P.R. A precise solution of the rotation bending Schrödinger equation for a triatomic molecule with application to the water molecule *J. Mol. Spectrosc.* **1979**, *74*, 1–8.
- (14) Shimanouchi, T. *Tables of Molecular Vibrational Frequencies, Consolidated Volume 1*; Nat. Stand. Ref. Data. Ser., 1972.
- (15) Herzberg, G. *Electronic spectra and electronic structure of polyatomic molecules Vol. 3: Electronic spectra and electronic structure of polyatomic molecules*; msms, 1966.
- (16) Cox, P.A.; Riveros, J.M. Microwave spectrum and structure of nitric acid *J. Chem. Phys.* **1965**, *42*, 3106–3112.
- (17) Huber, K.P.; Herzberg, G. *Molecular Spectra and Molecular Structure. IV. Constants of Diatomic Molecules*; Van Nostrand Reinhold Co., 1979.
- (18) Häußler, A.; Klapötke, T.M.; Piotrowski, H. Experimental and theoretical study on the structure of nitramide  $\text{H}_2\text{NNO}_2$  *Z. Naturforsch. B* **2002**, *57*, 151–156.
- (19) National Institute of Standards and Technology (U.S.). *NIST Chemistry Webbook: NIST Standard Reference Database Number 69*; NIST, 2000
